# Supplementary material
Source: PubMed Central journal article supplement (PMC6181785)
Supplement: NIHMS964520-supplement-supplement_1.pdf [file NIHMS964520-supplement-supplement_1.pdf]

## Supplementary Methods:

### A. Tag- and proxy SNP identification

23 *ABCC8* tag-SNPs (including 2kb at the 5' and 3' ends) were identified using HapMap (HapMap-3 Release-2, NCBI B36, CEU population, [http://hapmap.ncbi.nlm.nih.gov/cgi-perl/gbrowse/hapmap3r2\\_B36/](http://hapmap.ncbi.nlm.nih.gov/cgi-perl/gbrowse/hapmap3r2_B36/)) with the tagger-algorithm pairwise approach,  $r^2 \geq 0.8$  and minor allele frequency  $> 0.20$ . After eliminating tag-SNPs predicted to fail multiplexing, or with a low call-rate ( $< 90\%$ ) when genotyped, 15 tag-SNPs were included in the final analysis: rs11024273, rs11024286, rs2074311, rs2237982, rs2237991, rs2299639, rs3758953, rs4148618, rs4148622, rs4148641, rs4757517, rs7105832, rs7124355, rs7947462, rs916827. Eight tag-SNPs were eliminated: rs2283257 was in complete linkage disequilibrium (LD) with rs4148618 and therefore removed to minimize duplication. Rs2188966, rs2283255, rs757110 and rs2283258 were excluded due to predicted primer interactions precluding successful multiplexing on MassARRAY (the latter two were previously evaluated in a smaller whole-exome analysis<sup>4</sup>). Rs7950189 and rs1109591 were excluded due to low call rates. The rs7106053 assay revealed a split heterozygote cluster, low-mass homozygote peak in the no-template-control, and no calls for the high-mass homozygote. Proxy-SNPs associated with tag-SNPs based on LD ( $r^2 \geq 0.8$ ) were identified using SNP annotation and proxy search (SNAP, Broad Institute, Version 2.2)<sup>23</sup>.

### B. DNA collection and Genotyping

DNA was collected per our previously published methods<sup>4,24</sup>. Three primers were designed for each tag-SNP using MassARRAY Design-3.1 (two amplification primers flanking the polymorphic site for sample amplification, and a single MassExtend primer immediately adjacent to allow for allelic discrimination via single base extension). Genotyping using iPLEX-Gold was performed with an Agena Compact MassArray with Nanodispenser by the University of Pittsburgh Genomics Research Core (Supplementary Methods). For stringent quality control, known high-quality DNA and no-template controls were included

1  
2  
3 for each assay group. Blind technical duplicates were also included. Genotype analysis was performed  
4 using Typer-4.0. Assay quality was further verified by visual inspection of cluster plot and poorly  
5 performing assays (those with amplification in no-template controls or ambiguous clusters) were excluded  
6 from further analysis. Based on this quality control, 75/485 samples were excluded resulting in 410  
7 samples for final analysis. The average call rate for the 15 tag-SNPs analyzed was  $96.7 \pm 2\%$ . Research  
8 assistants involved in genotyping SNPs were blinded to outcomes.  
9  
10  
11  
12  
13  
14  
15  
16  
17

### 18 **C. Functional category prediction of *ABCC8* tag and proxy SNPs**

19  
20 Predicted SNP functional effects were investigated using F-SNP (<http://compbio.cs.queensu.ca/F-SNP/>)<sup>32</sup>.  
21 All significant SNPs were evaluated for established clinical significance via PubMed, Embase, and  
22 ClinVar searches. Previously reported SNPs associated with glucose metabolism disorders were similarly  
23 identified to investigate potential similarities/differences with SNPs associated with cerebral  
24 edema/outcomes in sTBI. The following search terms were used without restrictions: “*ABCC8*  
25 polymorphisms”, “*ABCC8* SNPs”, sulfonyleurea receptor 1 polymorphisms”, “sulfonyleurea receptor 1  
26 SNPs”, “*ABCC8* polymorphisms diabetes”, “*ABCC8* SNPs diabetes”, “*ABCC8* polymorphisms glucose”,  
27 “*ABCC8* SNPs glucose”, “*ABCC8* polymorphisms insulin”, “*ABCC8* SNPs insulin”. Reference lists for  
28 major reviews were also scrutinized. References were individually examined for SNPs (identified by their  
29 reference-SNP cluster identification, rsID) significantly associated with glucose metabolism disorders.  
30 For variants reported using human genome variation society (HGVS) nomenclature, ClinVar was  
31 searched using the HGVS identification to obtain the equivalent rsID whenever available. Finally,  
32 “*ABCC8*” was searched in ClinVar to identify any additional SNPs associated with disorders of glucose  
33 metabolism.  
34  
35  
36  
37  
38  
39  
40  
41  
42  
43  
44  
45  
46  
47  
48  
49  
50  
51  
52  
53  
54  
55  
56  
57  
58  
59  
60

**SUPPLEMENTARY RESULTS*****Risk-alleles CTGA are associated with average-ICP***

Since none of the four tag-SNPs were in LD, risk-allele combinations were analyzed as haplotypes. Risk-alleles CTGA were present in 4.6% of the cohort and was significantly associated with average-ICP (Supplemental Table 1) in multiple models including the global haplotype test ( $p=0.0008$ ) as well as individual haplotype specific tests using univariate and multivariate generalized linear regression model (Haplo.glm). No risk-allele combinations of the significant tag-SNPs were associated with CT edema or 3-month GOS.

1  
2  
3  
4  
5  
6  
7  
8  
9  
10  
11  
12  
13  
14  
15  
16  
17  
18  
19  
20  
21  
22  
23  
24  
25  
26  
27  
28  
29  
30  
31  
32  
33  
34  
35  
36  
37  
38  
39  
40  
41  
42  
43  
44  
45  
46  
47

**SUPPLEMENTAL TABLE 1: ABCC8 TAG-SNP RISK ALLELE HAPLOTYPE ASSOCIATED WITH AVERAGE INTRACRANIAL PRESSURE IN SEVERE TBI**

| Outcome      | Haplotype* | Haplotype Frequency | Hapscore Model |                | Univariate Regression         |               | Multivariate Regression       |               |
|--------------|------------|---------------------|----------------|----------------|-------------------------------|---------------|-------------------------------|---------------|
|              |            |                     | Hapscore       | p-value        | $\beta$ -coefficient $\pm$ SE | p-value       | $\beta$ -coefficient $\pm$ SE | p-value       |
| Average -ICP | CTGA       | 4.6%                | 2.652          | <b>0.0008*</b> | 4.16 $\pm$ 1.2                | <b>0.001*</b> | 3.53 $\pm$ 1.14               | <b>0.002*</b> |
| Peak ICP     | CTGA       | 4.6%                | 1.817          | 0.069          | 5.98 $\pm$ 4.31               | 0.17          | 4.38 $\pm$ 4.03               | 0.28          |

\*Haplotypes derived from tag-SNPs rs7105832 (A/C), rs2237982 (C/T), rs11024286 (G/A), rs4148622 (G/A). Regression Models Reference Base: ACGG (all major alleles)

Patients with the CTGA risk-allele combination of tag-SNPs had significantly higher average ICP by 3.53 mmHg (multivariate, p=0.002) or 4.16 mmHg (univariate, p=0.001) versus those without. Maintaining internal consistency, this risk-allele set combines the variant-allele of rs7105832 (C) and the variant allele of rs2237982 (T) that were independently associated with increased CE measures in single locus analyses.

**Supplementary Table 2: ABCC8 Tag-and Proxy-SNP chromosome locations and predicted functional implications**

| #  | SNP ID     | Tag (T) /Proxy (P) | r <sup>2</sup> with Tag-SNP (if proxy) | Intron / Exon | Predicted Functional Category | Predicted Functional Results | FS Score | Pubmed Reference or ClinVar Reports                                      |
|----|------------|--------------------|----------------------------------------|---------------|-------------------------------|------------------------------|----------|--------------------------------------------------------------------------|
| 1  | rs2355017  | Proxy              | 0.83 rs4148622                         | I 20          | Transcriptional regulation    | Changed                      | 0.208    | None                                                                     |
| 2  | rs4148622  | Tag                | NA                                     | I 15          | Transcriptional regulation    | Changed                      | 0.176    | None                                                                     |
| 3  | rs11024286 | Tag                | NA                                     | I 10          | Transcriptional regulation    | Changed                      | 0.176    | Knuppel et al, 2013: obesity (no association)                            |
| 4  | rs17775256 | Proxy              | 1.0 rs7105832                          | I 10          | Transcriptional regulation    | Changed                      | 0.176    | None                                                                     |
| 5  | rs2237982  | Tag                | NA                                     | I 10          | Transcriptional regulation    | Changed                      | 0.176    | None                                                                     |
| 6  | rs2237981  | Proxy              | 1.0 rs2237982                          | I 10          | Transcriptional regulation    | Changed                      | 0.176    | Feng et al, 2008: diabetes associated with Gliclazide responsiveness     |
| 7  | rs2237979  | Proxy              | 1.0 rs7105832                          | I 10          | Transcriptional regulation    | Changed                      | 0.208    | None                                                                     |
| 8  | rs2283261  | Proxy              | 1.0 rs2237982                          | I 10          | Transcriptional regulation    | Unchanged                    | 0.05     | Jha et al, 2016 (CE)                                                     |
| 9  | rs757109   | Proxy              | 1.0 rs2237982                          | I 10          | Transcriptional regulation    | Changed                      | 0.176    | None                                                                     |
| 10 | rs7117162  | Proxy              | 1.0 rs7105832                          | I 10          | Transcriptional regulation    | Changed                      | 0.176    | None                                                                     |
| 11 | rs2040653  | Proxy              | 1.0 rs7105832                          | I 10          | Transcriptional regulation    | Changed                      | 0.176    | None                                                                     |
| 12 | rs11024290 | Proxy              | 1.0 rs2237982                          | I 8           | Transcriptional regulation    | Changed                      | 0.176    | None                                                                     |
| 13 | rs7947326  | Proxy              | 0.93 rs7105832                         | I 8           | Transcriptional regulation    | Changed                      | 0.208    | None                                                                     |
| 14 | rs6486370  | Proxy              | 0.97 rs2237982                         | I 7           | Transcriptional regulation    | Changed                      | 0.176    | None                                                                     |
| 15 | rs2057661  | Proxy              | 1.0 rs2237982                          | I 7           | Transcriptional regulation    | Changed                      | 0.208    | None                                                                     |
| 16 | rs2073586  | Proxy              | 1.0 rs2237982                          | I 6           | Transcriptional regulation    | Changed                      | 0.208    | None                                                                     |
| 17 | rs2073585  | Proxy              | 1.0 rs2237982                          | I 6           | Transcriptional regulation    | Changed                      | 0.208    | None                                                                     |
| 18 | rs2237976  | Proxy              | 1.0 rs2237982                          | I 6           | Transcriptional regulation    | Changed                      | 0.208    | None                                                                     |
| 19 | rs2237975  | Proxy              | 0.97 rs7105832                         | I 6           | Transcriptional regulation    | Changed                      | 0.176    | None                                                                     |
| 20 | rs2237974  | Proxy              | 0.97 rs7105832                         | I 6           | Transcriptional regulation    | Changed                      | 0.0      | None                                                                     |
| 21 | rs7105391  | Proxy              | 1.0 rs7105832                          | I 6           | Transcriptional regulation    | Unchanged                    | 0.05     | None                                                                     |
| 22 | rs886291   | Proxy              | 1.0 rs7105832                          | I 6           | Transcriptional regulation    | Unchanged                    | 0.0      | None                                                                     |
| 23 | rs7943461  | Proxy              | 1.0 rs7105832                          | I 4           | Transcriptional regulation    | Changed                      | 0.176    | None                                                                     |
| 24 | rs4148610  | Proxy              | 1.0 rs7105832                          | I 4           | Transcriptional regulation    | Changed                      | 0.176    | None                                                                     |
| 25 | rs4148609  | Proxy              | 0.97 rs7105832                         | I 4           | Transcriptional regulation    | Changed                      | 0.158    | Jablonski et al, 2010 diabetes (significant interaction with Metformin)  |
| 26 | rs2301703  | Proxy              | 0.97 rs2237982                         | I 4           | Transcriptional regulation    | Changed                      | 0.176    | ClinVar ID 157707: neonatal diabetes and hyperinsulinism (likely benign) |
| 27 | rs3819522  | Proxy              | 1.0 rs7105832                          | I 3           | Transcriptional regulation    | Unchanged                    | 0.05     | None                                                                     |
| 28 | rs3819517  | Proxy              | 0.93 rs7105832                         | I 3           | Transcriptional regulation    | Changed                      | 0.176    | None                                                                     |
| 29 | rs11024295 | Proxy              | 0.93 rs7105832                         | I 3           | Transcriptional regulation    | Changed                      | 0.176    | None                                                                     |
| 30 | rs7105832  | Tag                | NA                                     | I 3           | Transcriptional regulation    | Changed                      | 0.176    | None                                                                     |
| 31 | rs11826760 | Proxy              | 1.0 rs7105832                          | I 3           | Transcriptional regulation    | Changed                      | 0.208    | None                                                                     |
| 32 | rs4148607  | Proxy              | 0.97 rs7105832                         | I 3           | Transcriptional regulation    | Changed                      | 0.208    | None                                                                     |
| 33 | rs4148604  | Proxy              | 0.97 rs7105832                         | I 3           | Transcriptional regulation    | Unchanged                    | 0.05     | None                                                                     |
| 34 | rs2237968  | Proxy              | 0.97 rs7105832                         | I 3           | Transcriptional regulation    | Changed                      | 0.176    | None                                                                     |
| 35 | rs2237966  | Proxy              | 0.90 rs7105832                         | I 2           | Transcriptional regulation    | Changed                      | 0.176    | None                                                                     |
| 36 | rs4148601  | Proxy              | 0.93 rs7105832                         | I 2           | Transcriptional regulation    | Changed                      | 0.208    | None                                                                     |
| 37 | rs2283254  | Proxy              | 0.93 rs7105832                         | I 2           | Transcriptional regulation    | Unchanged                    | 0.0      | None                                                                     |

I= intron, E= exon, FS= functional significance.

Supplemental Figure 1 Linkage disequilibrium plot of significant tag and proxy SNPs

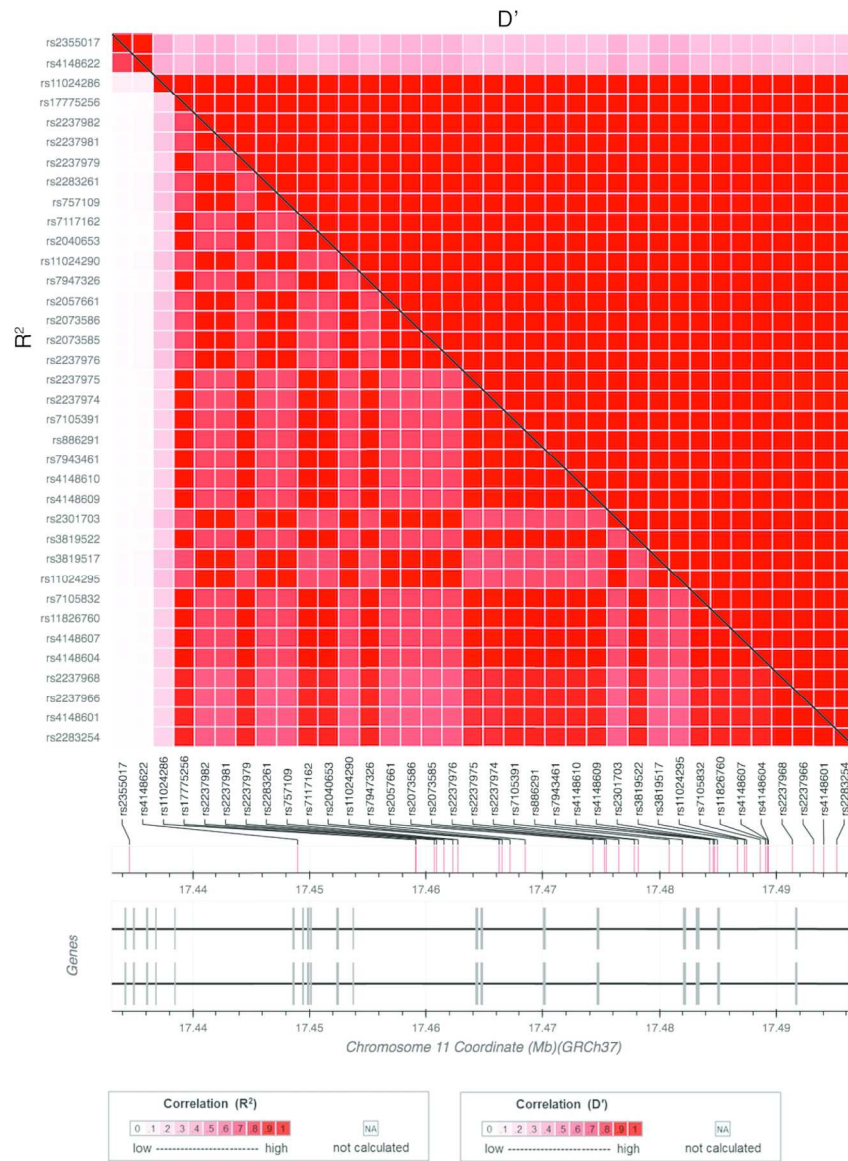

191x264mm (300 x 300 DPI)
